# Supplementary material
Source: PubMed Central journal article supplement (PMC9083243)
Supplement: NIHMS1801438-supplement-Suppl_info.pdf [file NIHMS1801438-supplement-Suppl_info.pdf]

## Supporting Information

### Defining the Caprin-1 interactome in unstressed and stressed conditions

Lucas Vu<sup>1+</sup>, Asmita Ghosh<sup>2,3+</sup>, Chelsea Tran<sup>1,4</sup>, Walters Aji Tebung<sup>2,3</sup>, Hadjara Sidibé<sup>2,3</sup>, Krystine Garcia-Mansfield<sup>5</sup>, Victoria David-Dirgo<sup>5</sup>, Ritin Sharma<sup>5</sup>, Patrick Pirrotte<sup>5</sup>, Robert Bowser<sup>1</sup>, and Christine Vande Velde<sup>2,3\*</sup>

<sup>1</sup> Department of Neurobiology, Barrow Neurological Institute, Phoenix, AZ, USA

<sup>2</sup> Department of Neurosciences, Université de Montréal, Montreal, QC, Canada

<sup>3</sup> CHUM Research Center, Montréal, QC, Canada

<sup>4</sup> School of Life Sciences, Arizona State University, Tempe, AZ, USA

<sup>5</sup> Collaborative Center for Translational Mass Spectrometry, Translational Genomics Research Institute, Phoenix, AZ, USA

**+ These authors contributed equally to this work (co-first authors)**

**\* Corresponding Author:** Christine Vande Velde, Ph.D.

Email: [c.vande.velde@umontreal.ca](mailto:c.vande.velde@umontreal.ca)

## **Supporting Information -Table of Contents**

**Figure S1** - Western blot membrane of the Caprin-1 and IgG immuno-precipitated (IP) fractions.

**Figure S2** - Gene ontology analysis using DAVID on the unstressed interactors of Caprin-1.

**Figure S3** - Known protein-protein interactions for SA-stress dependent Caprin-1 interactors.

**Figure S4** - Comparison of stress-dependent Caprin-1 interactome with previously published SG interactomes.

**Figure S5** - Shortlisted Caprin-1 interactors which did not co-localize with SGs in HeLa cells subjected to oxidative stress.

**Figure S6** - Colocalization of SNRNP200, ANKHD1, TALIN-1 and GEMIN5 with stress granules with thermal and osmotic stress.

**Table S1**- List of antibodies used.

**Table S2** - Table of all proteins identified from each IP experiment and their overlap from Figure 1D.

**Table S3** - Protein lists corresponding to the Venn diagram in Figure 2A.

**Table S4** - Protein lists corresponding to pathway analysis in Figure 2B.

**Table S5** - Protein lists for pathway analysis, corresponding to in Figure 3A.

**Table S6** - Protein lists corresponding to Venn diagrams in Figure S4A – S4D.

**Table S7** - Protein lists corresponding to the Venn diagram comparing RNA binding proteins and significant high confidence Caprin-1 interactors from Figure 3C.

Figure S1

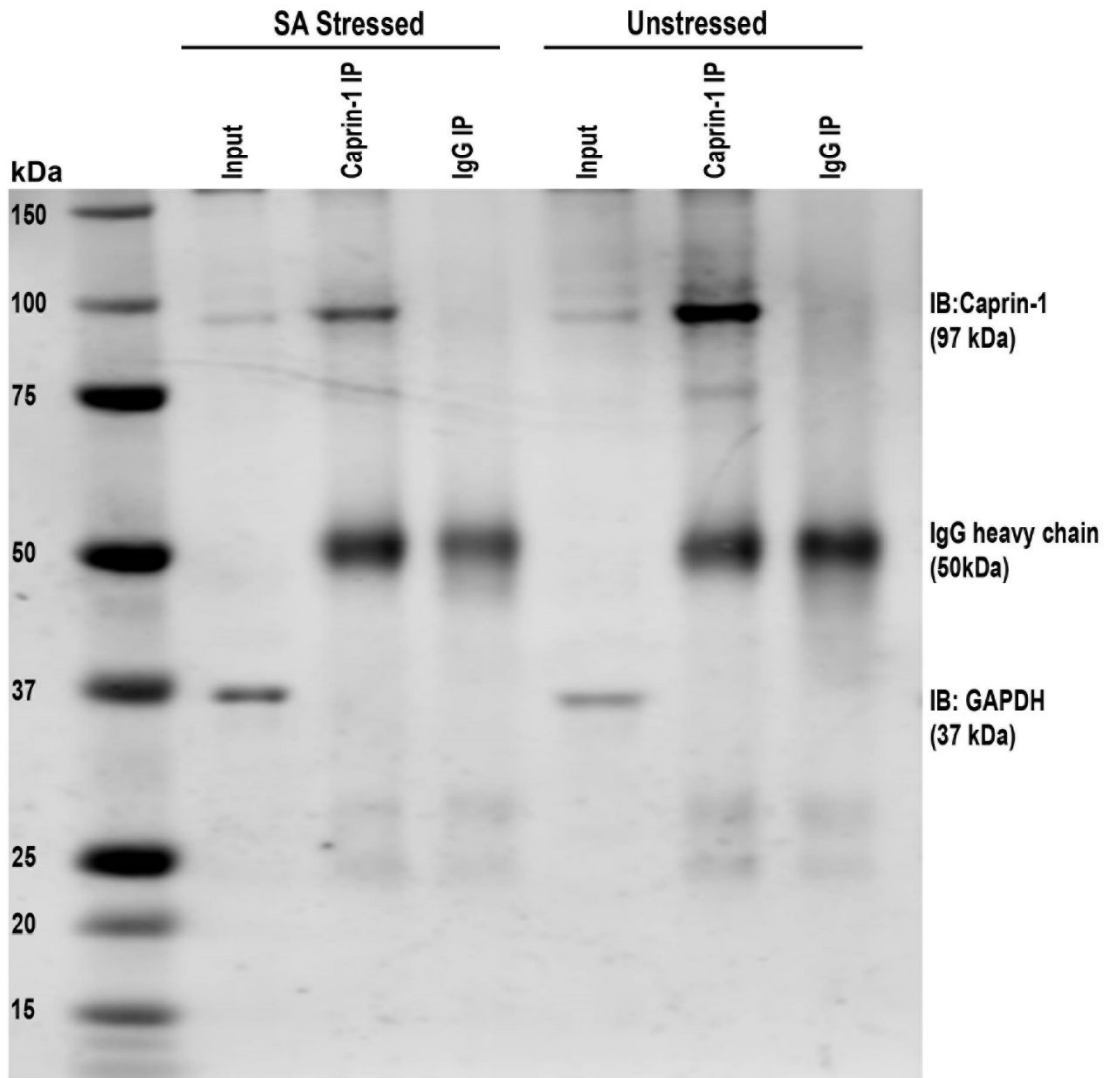

**Figure S1: Western blot membrane of the Caprin-1 and IgG immuno-precipitated (IP) fractions:** Immunoblot of Caprin-1 in the Caprin-1 IP and IgG IP fractions from lysates derived from both stressed and unstressed conditions in HeLa cells, demonstrating the presence of Caprin-1 only in the Caprin-1 IP and not in the IgG IP control. GAPDH was used as a loading control.

**Figure S2**

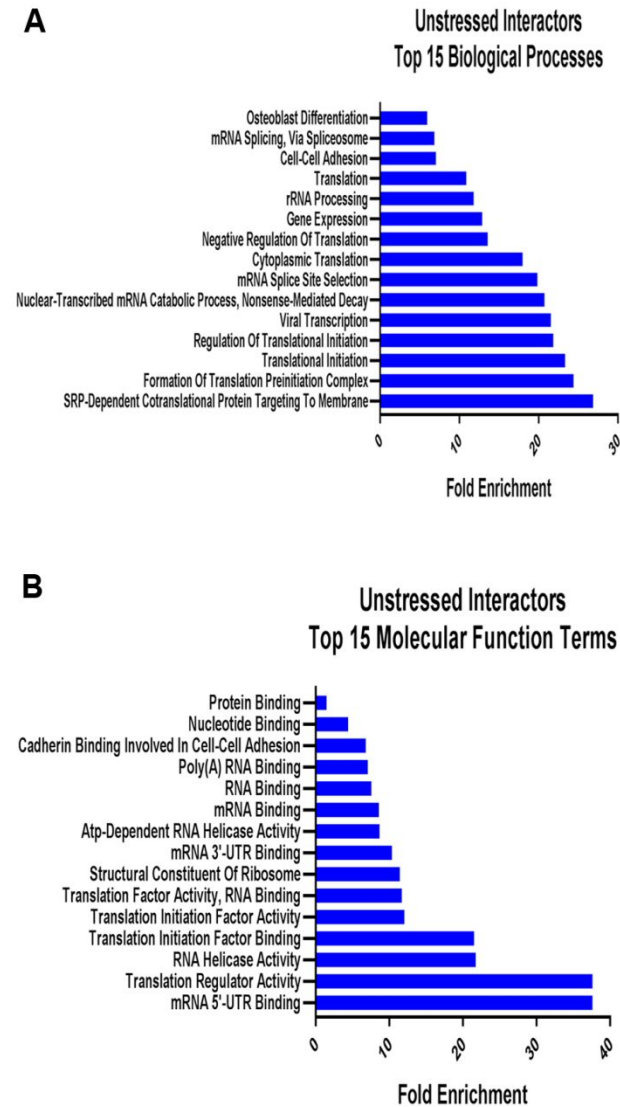

**Figure S2: Gene ontology analysis using DAVID on the unstressed interactors of Caprin-1.** A) The top 15 biological processes and B) top 15 Molecular functions terms. Benjamini-Hochberg correction was applied and all terms shown exhibited  $p < 0.05$ .

**Figure S3**

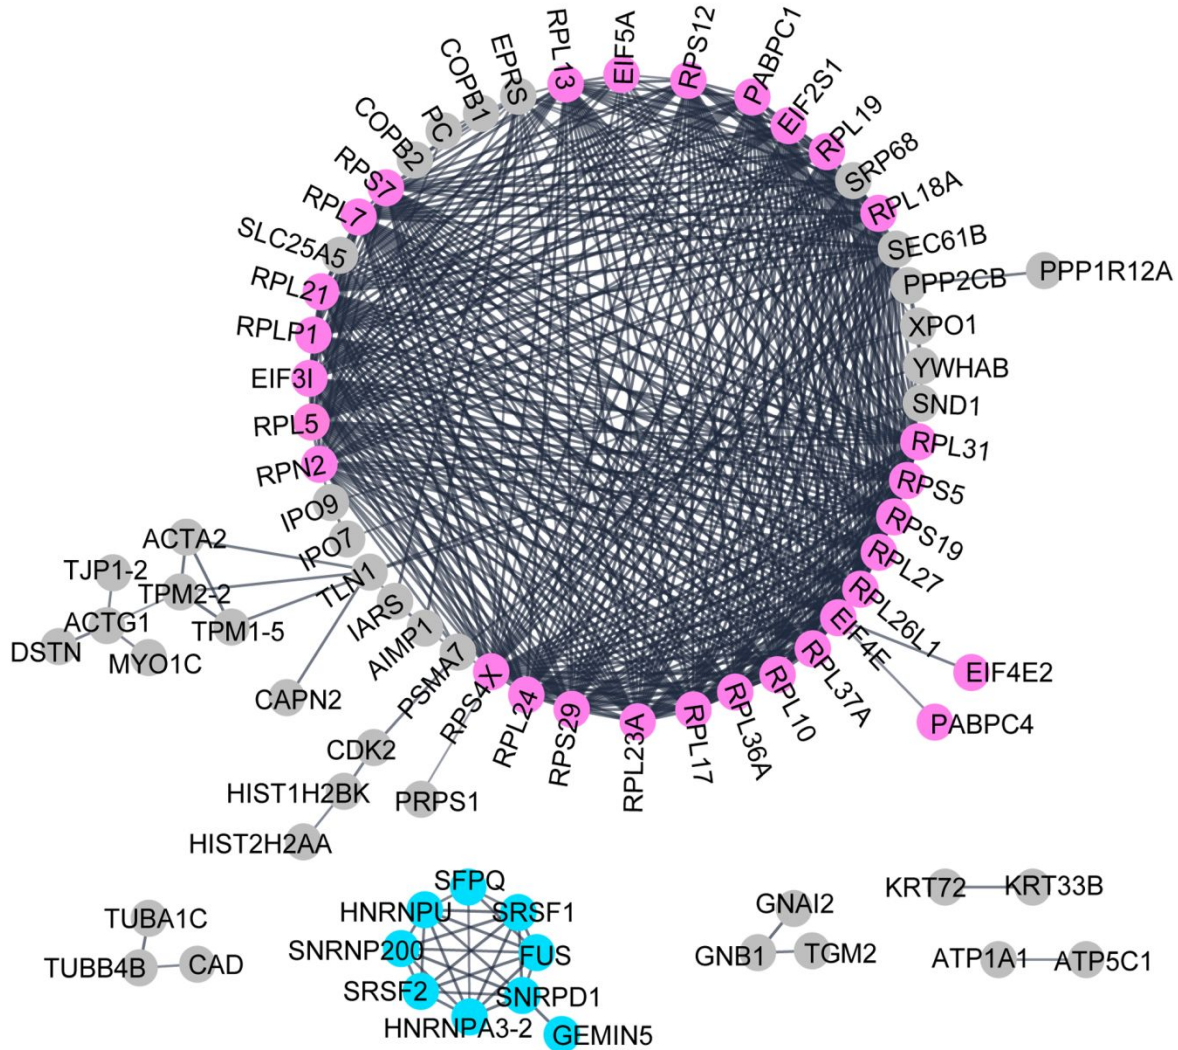

**Figure S3: Known protein-protein interactions for SA-stress dependent Caprin-1 interactors.** StringDB analysis demonstrating protein-protein interactions between the stressed dependent interactors of Caprin-1 with distinct clusters annotated to the RNA binding proteins (pink) and splicing factors (blue). All other interactors are labeled in gray.

Figure S4

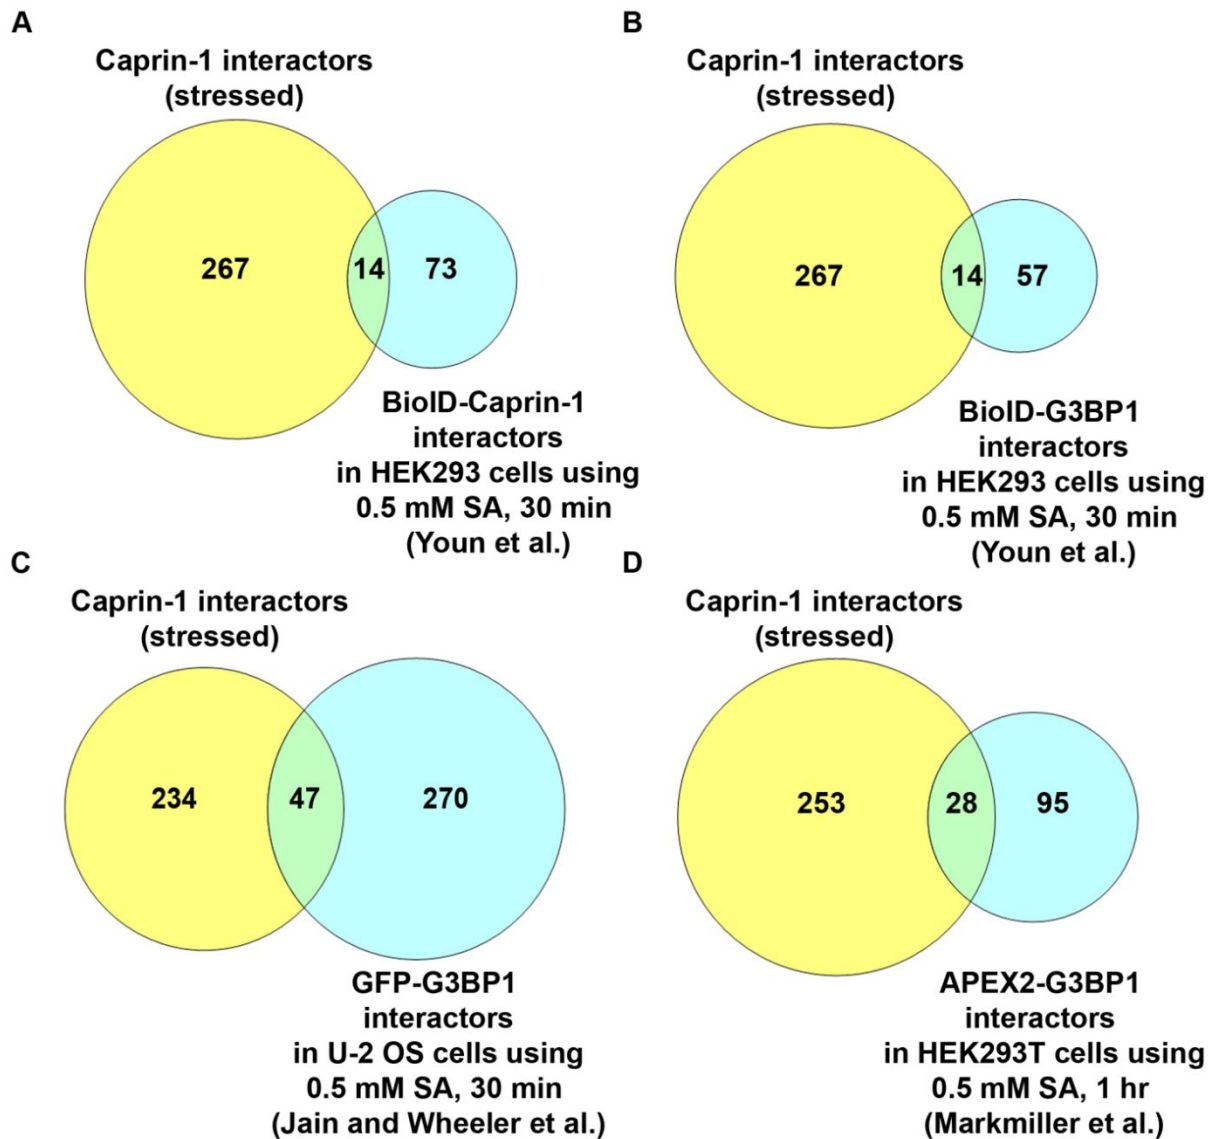

**Figure S4: Comparison of stress-dependent Caprin-1 interactome with previously published SG interactomes.** A) Comparison with BioID-based Caprin-1 interactome in HEK293 cells following acute SA stress for 30 mins. B) Comparison with BioID-based G3BP1 interactome of SGs in HEK293 cells following acute SA stress for 30 mins. C) Comparison with SG interactome in U2OS cells probed by a GFP-tagged G3BP1 following acute SA stress for 30 mins. D) Apex-G3BP1 labelling based SG interactome in HEK293T cells following SA stress for 1 hr.

Figure S5

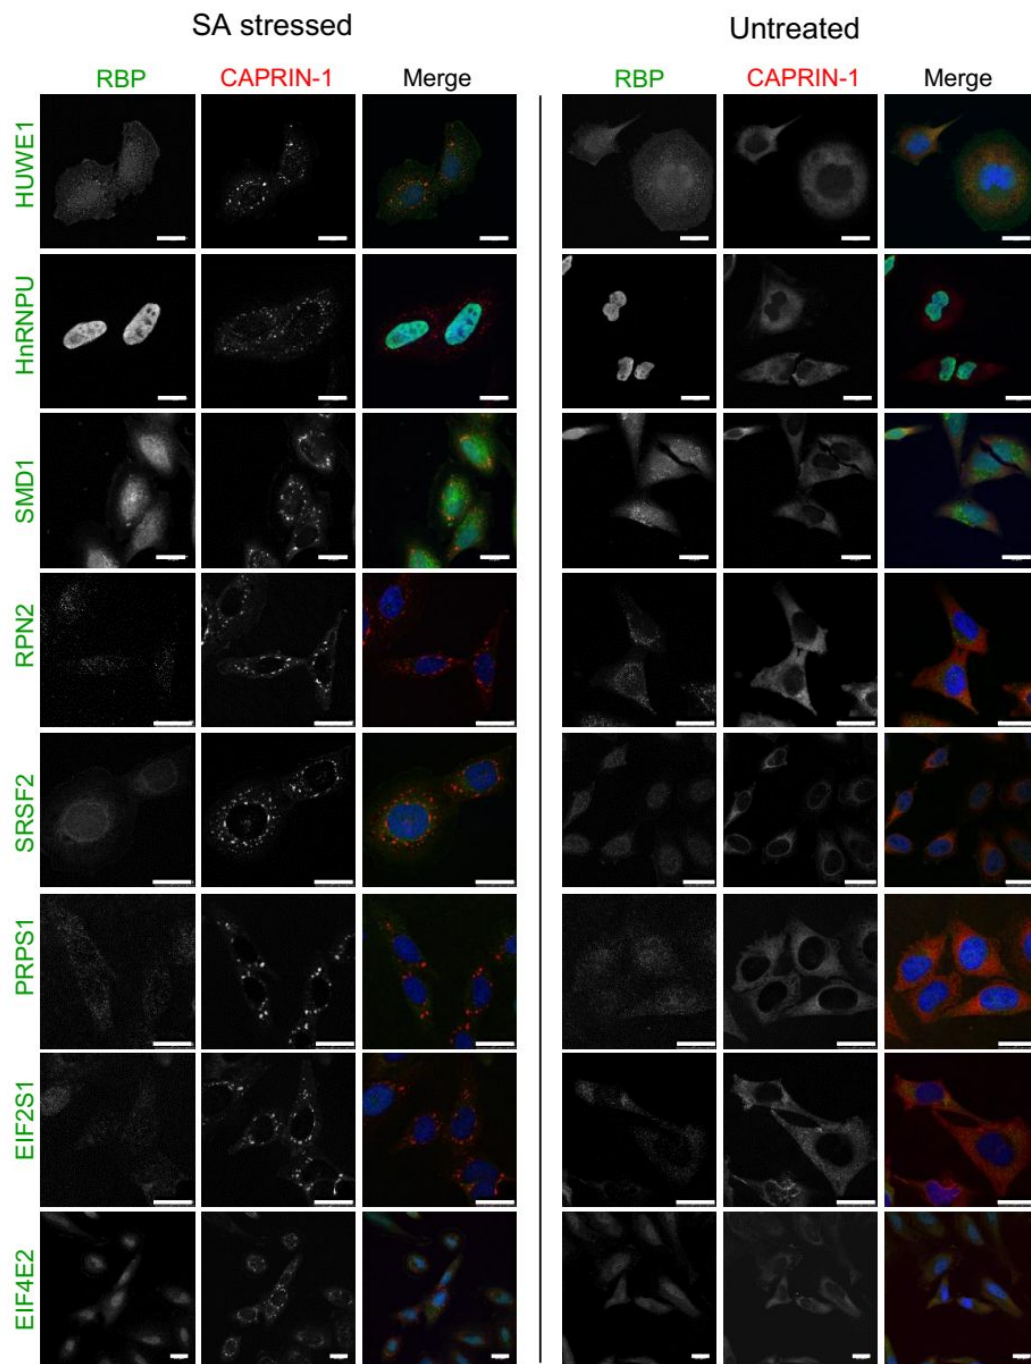

**Figure S5: Shortlisted Caprin-1 interactors which did not co-localize with SGs in HeLa cells subjected to oxidative stress.** HeLa cells were either stressed with 0.5mM SA (left panel) or unstressed (right panel) and co-stained with Caprin-1 and the respective candidate proteins. Nuclei were visualized with DAPI. Scale bar, 25 $\mu$ m.

Figure S6

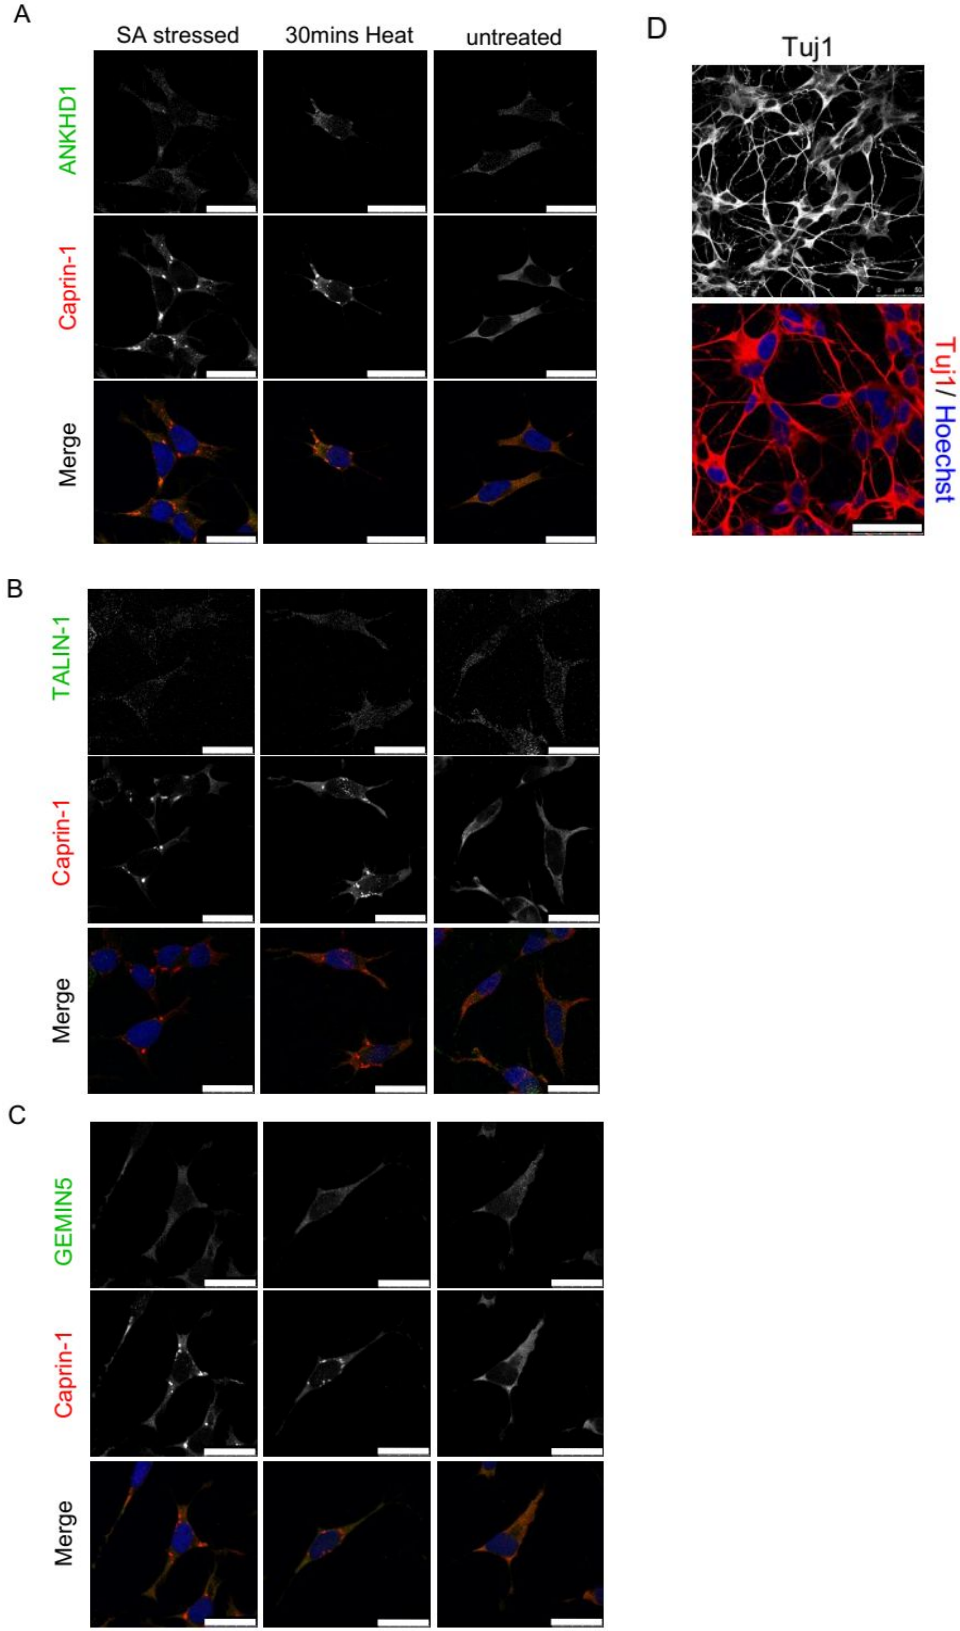



**Figure S6: Imaging of ANKHD1, TALIN-1 and GEMIN5 with stress granules in SH-SY5Y cells.** SH-SY5Y cells were stressed with either or 0.5mM SA (left) or 30 mins heat at 43°C (middle) or left untreated (right) and co-labelled for Caprin-1 and A) ANKHD1, B) Talin-1, and C) GEMIN5. Nuclei were visualized with Hoechst. Scale bar, 25 µm. D) Differentiated SH-SY5Y cells were labelled with Tuj1 and Hoechst. Scale bar, 50 µm.
